1 **TITLE: CReasPy-cloning: a method for simultaneous cloning and engineering of**  
2 **megabase-sized genomes in yeast using the CRISPR-Cas9 system**

3

4 **Authors and affiliation:**

5 Estelle Ruiz<sup>1,2</sup>, Vincent Talenton<sup>1,2</sup>, Marie-Pierre Dubrana<sup>1,2</sup>, Gabrielle Guesdon<sup>1,2</sup>, Maria  
6 Lluch-Senar<sup>3,4</sup>, Franck Salin<sup>5</sup>, Pascal Sirand-Pugnet<sup>1,2</sup>, Yonathan Arfi<sup>1,2</sup>, Carole Lartigue<sup>1,2\*</sup>

7

8 <sup>1</sup> INRA, UMR 1332 de Biologie du Fruit et Pathologie, F-33140 Villenave d'Ornon, France

9 <sup>2</sup> Univ. Bordeaux, UMR 1332 de Biologie du Fruit et Pathologie, F-33140 Villenave d'Ornon,  
10 France

11 <sup>3</sup> EMBL/CRG Systems Biology Research Unit, Centre for Genomic Regulation (CRG), The  
12 Barcelona Institute of Science and Technology, Dr Aiguader 88, Barcelona 08003, Spain.

13 <sup>4</sup> Universitat Pompeu Fabra (UPF), 08003 Barcelona, Spain.

14 <sup>5</sup> BIOGECO, INRA, Univ. Bordeaux, 33610 Cestas, France

15

16

17 **\*Corresponding author :**

18 INRA, Centre de Recherche de Bordeaux, UMR 1332 Biologie du Fruit et Pathologie, 71,  
19 avenue Edouard Bourlaux, CS 20032, 33882 Villenave d'Ornon Cedex, France.

20 Tel: +33 5 57 12 23 59; Fax: +33 5 57 12 23 69;

21 carole.lartigue-prat@inra.fr

22

23 **ABSTRACT** (250 words)

24 Over the last decade a new strategy was developed to bypass the difficulties to genetically  
25 engineer some microbial species by transferring (or “cloning”) their genome into another  
26 organism that is amenable to efficient genetic modifications and therefore acts as a living  
27 workbench. As such, the yeast *Saccharomyces cerevisiae* has been used to clone and engineer  
28 genomes from viruses, bacteria and algae. The cloning step requires the insertion of yeast  
29 genetic elements within the genome of interest, in order to drive its replication and  
30 maintenance as an artificial chromosome in the host cell. Current methods used to introduce  
31 these genetic elements are still unsatisfactory, due either to their random nature (transposon)  
32 or the requirement for unique restriction sites at specific positions (TAR cloning). Here we  
33 describe the CREasPy-Cloning, a new method that combines both the ability of Cas9 to cleave  
34 DNA at a user-specified locus and the yeast’s highly efficient homologous recombination to  
35 simultaneously clone and engineer a bacterial chromosome in yeast. Using the 0.816 Mbp  
36 genome of *Mycoplasma pneumoniae* as a proof of concept, we demonstrate that our method  
37 can be used to introduce the yeast genetic element at any location in the bacterial  
38 chromosome while simultaneously deleting various genes or group of genes. We also show  
39 that CREasPy-cloning can be used to edit up to three independent genomic loci at the same  
40 time with an efficiency high enough to warrant the screening of a small (<50) number of  
41 clones, allowing for significantly shortened genome engineering cycle times.

42

43

44 **KEYWORDS:** genome cloning, genome editing, CRISPR-Cas9, genome transplantation,  
45 *Mycoplasma*, *Saccharomyces cerevisiae*

46

47

48 **INTRODUCTION** (750 words)

49 Genetically engineering a living organism is a key technology, for both fundamental and  
50 applied purposes. The ability to specifically delete, replace or add a sequence to a genome can  
51 be used to study the function of a given gene or group of genes<sup>1</sup>, or to add new or improved  
52 functions to a cell<sup>2</sup>.

53 From early groundbreaking experiments on bacterial transformation<sup>3</sup>, to the most recent  
54 advances in genomic engineering using targetable nucleases<sup>4,5</sup>, a wide array of tools have  
55 been developed in order to introduce and maintain exogenous genetic material in an organism  
56 or to directly edit the existing genome. However, while multiple strategies are often available  
57 for the majority of model organisms, many species of biological interest still lack efficient  
58 genetic engineering tools<sup>6</sup>.

59 Over the last decade, it was proposed that these difficulties could be bypassed by transferring  
60 a whole genome to edit it into another cell where efficient tools are available<sup>7</sup>. This approach  
61 was in particular developed using the yeast *Saccharomyces cerevisiae* as a genetic workbench  
62 to manipulate whole bacterial chromosomes. This process was also applied for the creation of  
63 the first bacterial cell governed by a chemically synthesized genome<sup>8</sup> and the smallest  
64 engineered living organism<sup>9</sup>.

65 Given the large array of genetic tools available in yeast, including TREC<sup>10</sup>, TREC-IN<sup>11</sup>,  
66 CRISPR-Cas9<sup>12,13</sup>, this genome engineering strategy has generated a growing interest. To this  
67 date, a wide range of chromosomes from different organisms have been successfully cloned in  
68 yeast, originating from viruses<sup>14,15</sup>, bacteria<sup>16,17</sup> and algae<sup>18</sup>.

69 In order to clone a bacterial chromosome in yeast, several elements must be added to it. These  
70 “yeast elements” are: a yeast origin of replication, a yeast centromere and a selection marker.  
71 All these elements are required to drive the replication and maintenance of the foreign DNA,  
72 and are usually provided as a single cassette that can be inserted into the bacterial genome  
73 using two main strategies. The first one relies on an initial transformation of the bacteria with  
74 a transposon bearing the yeast elements<sup>7</sup>. While selection of living transformants ensures that  
75 the random integration of the transposon has not occurred in any locus essential for *in-vitro*  
76 growth, this method cannot be used to integrate the yeast elements at a specific position of the  
77 genome. The second strategy is based on the Transformation-Associated Recombination  
78 (TAR) cloning technique<sup>19</sup>. The complete bacterial genome is isolated in agarose plugs,  
79 linearized by restriction, and co-transformed into yeast together with the yeast element  
80 cassette flanked by recombination arms corresponding to both sides of the restriction locus.  
81 The yeast homologous recombination mechanism then circularize the bacterial chromosome

82 by integration of the cassette. This approach necessitates the presence of a unique restriction  
83 site in the bacterial genome, preferably in a non-essential locus, which can be hard to find and  
84 limits the number of integration sites available.

85 In this study, we have developed a new strategy called CREasPy-Cloning, in order to  
86 efficiently insert the yeast elements at any desired locus of a DNA fragment to be cloned in  
87 yeast. This method expands on the logic of TAR cloning, by using the CRISPR/Cas9 system  
88 to generate a double strand break at a precise site of the genome to clone. In addition, the  
89 flexibility offered by the choice of the insertion locus allows us to simultaneously perform the  
90 cloning and edition of a bacterial genome.

91 To demonstrate the effectiveness of the CREASPY-cloning strategy, we cloned with a high  
92 efficiency the genome of *Mycoplasma pneumoniae* M129<sup>20</sup> in yeast, while simultaneously  
93 deleting a gene encoding for a virulence factor. Analysis showed that the cloned genome was  
94 intact and essentially error-free. We successfully applied the same strategy to *Mycoplasma*  
95 *leachii* strain PG50<sup>21</sup>, in order to demonstrate that genomes cloned using CREASPY-cloning  
96 are suitable for genome transplantation. We then stretched the capability of CREASPY-  
97 cloning by successfully editing two or three distinct loci simultaneously.

98

## 99 **RESULTS AND DISCUSSION**

### 100 **Simultaneous cloning and engineering of *Mycoplasma pneumoniae* genome in yeast**

101 We have developed a method dubbed “CREasPy-cloning”, in order to perform the  
102 simultaneous cloning and engineering of megabase-sized genomes in yeast. Figure 1A  
103 outlines the general principle of the method. First, the yeast *Saccharomyces cerevisiae* strain  
104 VL6-48N is transformed with the plasmids pCas9 and pgRNA, allowing respectively the  
105 expression of a codon-optimized version of the Cas9 nuclease from *Streptococcus pyogenes*<sup>12</sup>  
106 and a chimeric guide RNA (gRNA) merging the CRISPR RNA with the trans-activating  
107 crRNA<sup>12,13,22,23</sup>. Then, the yeasts are co-transformed with the purified bacterial chromosome  
108 and a linear DNA cassette comprised of the CEN-HIS yeast elements<sup>7</sup> (CEN: centromere;  
109 HIS: histidine auxotrophic marker), an antibiotic resistance marker (used for an eventual back  
110 transplantation experiment later on<sup>24</sup>) and flanked with recombination arms corresponding to  
111 the locus to edit (Figure S1). The Cas9/gRNA complex generates a double strand break at the  
112 targeted locus on the bacterial chromosome, which is then repaired by the homologous  
113 recombination machinery of the yeast using the provided template cassette. As a result, the  
114 target locus is edited, and the bacterial genome now bears the CEN-HIS elements and is  
115 carried by the yeast as a large centromeric plasmid. After the CREasPy-cloning protocol, the

116 yeast transformants are screened using a combination of PCR analysis and chromosome size  
117 determination by PFGE, in order to check the integrity of the cloned genome.

118 As a proof of concept, we have used CREasPy-cloning to simultaneously clone and engineer  
119 the genome of the human pathogen *M. pneumoniae* M129 (816 kb), for which no efficient  
120 genome engineering tool is available. Three genes encoding virulence factors were targeted:  
121 MPN372 encoding the CARDS toxin<sup>25</sup>, MPN142 encoding a cytoadherence protein<sup>26,27</sup>, and  
122 MPN400 encoding an immunoglobulin-binding protein<sup>28</sup> (Figure 1B and 1C). In the case of  
123 MPN400, we targeted either the single gene or the operon it belongs to (MPN398-400). In the  
124 case of MPN142, we targeted either the single gene or part of the operon it belongs to  
125 (MPN142-143), as the other genes in the operon (MPN140-141) could be essential<sup>29</sup>.

126 Initially, a set of experiments targeting MPN372 was performed during which all the  
127 components (pgRNA, pCas9, chromosome and cassette) were co-transformed simultaneously  
128 in the yeast (Table S1). However, these experiments failed to yield positive clones. Therefore,  
129 an alternative protocol was set up, in which the pgRNA and pCas9 were transformed first, in  
130 order to give the yeast cells enough time to express the Cas9 nuclease and its partner gRNA  
131 before transformation with the bacterial chromosome. This strategy was much more efficient,  
132 and was used for the rest of the experiments described below.

133 First, the CREasPy-cloning was used to clone the *M. pneumoniae* genome while deleting the  
134 MPN372 gene (Figure 2). The presence of the *M. pneumoniae* genome cloned in yeast and the  
135 replacement of the target gene by the repair cassette were detected by simplex PCR. Twenty  
136 yeast transformants were screened, and all of them presented the expected profile with a  
137 single amplicon at 3,595 bp (Figure 2A). In a second step, a multiplex PCR was performed  
138 using two sets of 10 primer pairs, targeting a total of 20 loci evenly spread on the  
139 chromosome of *M. pneumoniae* (Figure S2), to check the completeness of the cloned genome.  
140 A total of 16 clones out of the 20 tested presented the expected 10 bands profile with both sets  
141 of primers (Figure 2B). Four clones (6.6, 6.7, 7.5 and 7.8) lacked one or more amplicons in  
142 one or both multiplex PCR, indicating that either one or several large parts of the bacterial  
143 genome had been lost during the CREasPy-cloning process. The cause of these large deletions  
144 in genomes that harbor the repair cassette at the correct location, is currently unknown, but  
145 might be linked to the documented off-target activity of Cas9<sup>30-32</sup>. Indeed, if the nuclease  
146 cleaves the DNA at undesired loci, the yeast would need to perform a homologous  
147 recombination between two similar sequences elsewhere in the genome in order to maintain  
148 it. This phenomenon could be bolstered by the effective presence of multiple repeated regions  
149 in the genome of *M. pneumoniae*<sup>33-35</sup>. The final transformants screening was based on the

150 analysis of large DNA fragments generated by enzymatic restriction of the edited  
151 chromosome followed by PFGE. Among the 16 yeast clones validated by multiplex PCR, six  
152 were randomly selected and checked (Figure 2C). Five clones presented the expected profile,  
153 identical to that of the non-edited genome, with two fragments at 711 kbp and 105 kbp, for a  
154 chromosome size of 816 kbp.

155 In order to demonstrate the robustness of the CREasPy-cloning editing method, the same  
156 process was applied for the targeted deletions listed in Table 1. For the deletions MPN400  
157 and MPN398-400, 100% of the 20 tested clones were found positive by simplex PCR. When  
158 we targeted the MPN142 and MPN142-143 regions, 95% and 80% of the screened clones had  
159 the expected simplex PCR profiles, respectively (Table 1). At the next step, 79%, 69%, 50%  
160 and 70% of the clones validated by simplex PCR were found positive in multiplex PCR, for  
161 the deletion of MPN142, MPN142-143, MPN400 and MPN398-400, respectively. Finally,  
162 67%, 67%, 83% and 83% of the clones tested by PFGE were positive, for MPN142,  
163 MPN142-143, MPN400 and MPN398-400, respectively (Table 1).

164 Overall, the CREasPy-cloning method we developed exhibits a high efficiency, as only a  
165 small number of clones (around 20) have to be screened to identify those carrying the  
166 expected edited bacterial chromosome. Using a yeast elements cassette which does not  
167 contain an Autonomously Replicating Sequence<sup>36</sup> (ARS) was identified as a key factor in  
168 reaching this high efficiency. The ARS acts as an origin of replication for the artificial yeast  
169 chromosome<sup>7</sup> and must contain a copy of the essential 11 bp ARS Consensus Sequence: 5'-  
170 WTTTAYRTTTW-3'. It has been reported that removing the ARS sequence from TAR vector  
171 increased the efficiency of transformation<sup>37</sup>. This improvement was linked to the fact that the  
172 recombination template tends to circularize instead of integrating into the bacterial  
173 chromosome during yeast transformation. This circular element bearing the ARS sequence is  
174 efficiently replicated in yeast, leading to false-positive clones. In our case, the removal of the  
175 ARS sequence did not jeopardize the replication of the *M. pneumoniae* chromosome by the  
176 yeast machinery, as the 11 bp ARS Consensus Sequence is present 19 times in the bacterial  
177 genome. During an initial experiment, we performed CREasPy-cloning experiment with an  
178 ARS-containing or an ARS-less recombination template (Table S2), and obtained better  
179 results with the latter.

180 In addition, several other genome cloning experiments were also performed in the yeast *S.*  
181 *cerevisiae* strain W303a, as this strain and the strain VL6-48N were both used in previous  
182 studies focused on the cloning and edition of mycoplasma genomes in yeast<sup>7,38,39</sup>. Overall,

183 similar transformation efficiencies were obtained for both strains (data not shown). Strain  
184 VL6-48N was retained for the rest of the experiments.

185

### 186 **Application of CReasPy-cloning to multiple *Mycoplasma* species**

187 Following the successful development of our method for cloning and editing *M. pneumoniae*  
188 genome, we applied it on two other mycoplasma species: *Mycoplasma leachii* strain PG50  
189 and *Mycoplasma mycoides* subsp. *mycoides* strain Afadé (*Mmm*). The aims of these  
190 experiments were to *i*) validate the CReasPy-cloning method for larger chromosomes, *ii*) re-  
191 clone mycoplasma genomes for which the yeast elements were previously inserted randomly  
192 by transposons<sup>39</sup> and, *iii*) check the ability of the CReasPy-cloned genomes to be efficiently  
193 transplanted.

194 We succeeded in cloning *M. leachii* genome (~1 Mb) while inactivating MSB\_0138, a gene  
195 encoding a beta-lactamase. We also successfully performed the cloning of *Mmm* genome  
196 (~1.2 Mb), while deleting of TS60\_0301-0299, a trio of genes encoding an  $\alpha$ -  
197 glycerolphosphate oxidase, a glycerol kinase and a glycerol facilitator. Positive yeast clones  
198 carrying edited whole genomes were obtained for both species (Table 2 and Figure S4-S5).  
199 We observed that the cloning efficiencies of *Mmm* and *M. leachii* genomes (Table 2) were in  
200 the same range as those measured for *M. pneumoniae*, indicating that the CReasPy-cloning  
201 method is well suited for chromosomes in the megabase range.

202 In the case of *M. leachii*, the genome CReasPy-cloned in yeast of clones 9, 34, 36, 37 and 39  
203 were isolated and transplanted in the recipient cell *Mycoplasma capricolum*<sup>38</sup>, yielding  
204 between 10 and 50 colonies depending on the clone (cl. 8 yielded no transplant). Forty  
205 putative bacterial transplants were analyzed by simplex PCR (Figure S4): 36 were identified  
206 as edited *M. leachii* cells while the other 4 were identified as *M. capricolum* tetracycline  
207 spontaneous resistant<sup>39</sup>. These experiments confirmed the robustness of the CReasPy-cloning  
208 as a fast and efficient method for the production of mutant strains of bacteria, provided that a  
209 transplantation protocol exists for these species. As such protocols are not currently available  
210 for *M. pneumoniae* and *Mmm*, transplantation of their CReasPy-cloned genomes were not  
211 attempted during this study.

212 It is currently unknown whether the size of the target chromosome is a limiting factor for the  
213 “in-yeast cloning” process. Currently, the largest genomes carried in yeast in a single piece  
214 are the 1.8 Mbp genome of *Haemophilus influenzae*<sup>17</sup> and the 1.8 Mbp genome of  
215 *Spiroplasma citri*<sup>39</sup>. Interestingly, a recent experiment of chromosome fusion in *S. cerevisiae*  
216 has shown that the yeast can readily replicate a single chromosome of 11.8 Mbp<sup>40</sup>. This result



217 suggests that the limit might not be the size of the chromosome to clone, but rather how much  
218 total DNA the yeast can carry (6.8% excess for *M. pneumoniae*, 15% excess for *H.*  
219 *influenzae*). The advent of synthetic strains of *S. cerevisiae* could offer some insights, as these  
220 cells have significantly reduced genomes (around 1.1 Mbp removed from Sc2.0)<sup>41</sup> and might  
221 allow to clone larger chromosomes.

222

### 223 **Simultaneous cloning and multi-target edition of *Mycoplasma pneumoniae* genome**

224 In order to improve our ability to efficiently create highly edited bacterial genomes, we  
225 evaluated if CReasPy-cloning could be used to perform simultaneous multi-target editions. To  
226 do so, we performed the deletion of either two or three loci: MPN372\*/MPN400; MPN142-  
227 143\*/MPN398-400; MPN372\*/MPN142-143; MPN372\*/MPN142/MPN400;  
228 MPN372\*/MPN142-143/MPN398-400. For each experiment, one locus was replaced by the  
229 yeast element cassette (indicated by a "\*" next to the locus name) as the other locus or loci  
230 was simply deleted by homologous recombination with a DNA template.

231 The multi-target protocol is based on the same principle as the single-target CReasPy-cloning,  
232 with few modifications (Figure 3). First, the yeasts are "primed" by transformation with  
233 pCas9 and a multi-guide pgRNA. To reduce the possibility of off-target cleavage by the Cas9  
234 nuclease, we elected to use the mutant eSpCas9 which was shown to have a higher  
235 specificity<sup>42</sup> than the wild-type. Afterwards, the cells are co-transformed with *M. pneumoniae*  
236 chromosome and 2 or 3 recombination templates. One of the template contains the CEN-HIS  
237 yeast elements, while the other or other two are clean deletion cassettes comprised of two  
238 juxtaposed 500 bp regions identical to the loci surrounding the gene to delete. These cassettes  
239 are tedious to produce (here by overlap PCR), but the large size of their recombination arms  
240 have a positive impact on the recombination efficiency<sup>37</sup>, which offset the lack of a selection  
241 marker. Alternatively, 2x45 bp deletion cassettes, easily produced by annealing of two 90 bp  
242 oligonucleotides, can be used and have been shown to be efficient to engineer the genome of  
243 *S. cerevisiae*<sup>12</sup> or to edit a mycoplasma genome cloned in *S. cerevisiae*<sup>13</sup>. After the multi-  
244 target CReasPy-cloning, yeast transformants were screened using the same process as in the  
245 single-target protocol.

246 Figure 4 illustrates an example of screening for the triple deletion  
247 MPN372\*/MPN142/MPN400. Twenty yeast clones were first checked by simplex PCR for  
248 the deletion of MPN372 and its replacement by the yeast elements cassette (Figure 4A),  
249 which yielded 14 positive clones with the expected amplicon at 3,596 bp. These positive  
250 clones were subsequently screened by PCR for the deletion of MPN142 (Figure 4B), yielding



251 four positive clones presenting the expected 965 bp band. Finally, the deletion of MPN400  
252 was assessed (Figure 4C), resulting in three positive clones presenting the expected 2,156 bp  
253 band. The three clones obtained for the triple deletion were successfully validated by  
254 multiplex PCR (Figure 4D) and PFGE (Figure 4E).

255 All the multi-target deletions tested yielded positive clones (Table 3). As expected, due to the  
256 large number of co-transformed DNA fragments, the efficiency of the multi-target approach is  
257 significantly lower than that of the single-target CReasPy-cloning. Nonetheless, this  
258 efficiency is still high enough (minimum of 5% of the screened clones are fully validated) to  
259 warrant the screening of a relatively small set of transformants (*i.e.* <50). It is interesting to  
260 note that the majority of the negative simplex PCR showed no amplification instead of  
261 amplification of the wild-type locus, suggesting that the targeted region is absent of the final  
262 chromosome. This high rate of unwanted deletions could be caused by the stochastic nature of  
263 the transformation process. Indeed, for the CReasPy-cloning process to occur properly, each  
264 cell must receive at least one copy of each recombination template. As there is a low  
265 probability of this perfect-case scenario to occur, many cells will lack one or more templates.  
266 As a result, the transformed chromosome will be cleaved at the desired site, but in the absence  
267 of a template the recombination will happen in a spurious manner between similar loci. This  
268 suggests that, although possible in theory, stretching the CReasPy-cloning strategy to four or  
269 five targets might not be practical. Nonetheless, the ability to simultaneously clone a  
270 megabase-sized genome and edit three individual loci is still a significant improvement over  
271 existing strategies.

272

### 273 **Whole genome sequencing of genomes cloned in yeast by CReasPy-cloning.**

274 Whole genome sequencing was performed on one of the genome cloned and edited using  
275 CReasPy-cloning, in order to check whether our protocol had any mutagenic effects. We  
276 selected one clone from the double target experiment (MPN372\*/MPN142-143 clone 4.8).  
277 Genomic DNA (including the cloned bacterial chromosome) was extracted from the yeast  
278 transformants and sequenced using both short reads (Illumina) and long reads technologies  
279 (Oxford Nanopore). As a control, the original *M. pneumoniae* M129 genome used for  
280 CReasPy-cloning experiments was re-sequenced using Illumina technology. *De novo*  
281 assembly of the genome of clone 4.8 was achieved using long and short reads, yielding a  
282 single contig. Global alignment of the clone 4.8 assembly with the expected genome design  
283 confirmed that no large deletion or chromosomal shuffling had occurred. In order to identify  
284 potential SNP or short indels, Illumina short reads from clone 4.8 and control *M. pneumoniae*

285 M129 were mapped on the published genome sequence of *M. pneumoniae* strain M129  
286 (Genbank ID NC\_000912.1). The control clone of *M. pneumoniae* M129 used in our study  
287 presented 105 SNP and 19 indels compared to the M129 published genome. Those mutations  
288 were also identified in the genome of clone 4.8, suggesting that they occurred before the  
289 CREasPy-cloning process. Two additional mutations that were found only in clone 4.8. The  
290 first is an AAG to AAU transversion at position 182216 of the genome, leading to a K to N  
291 amino acid change in MPN141 (adhesin P1). The second is an insertion of ATGTTTG at  
292 position 452508 of the genome, in a region predicted to encode the ncRNA MPNnc041. The  
293 extent of the mutations observed in clone 4.8 suggest that the CREasPy-cloning method has  
294 no large mutagenic effect. However, SNP were expected as a result of natural genetic drift  
295 during the passages of either the mycoplasma or yeast cells in the laboratory.

296

### 297 ***In vitro* CREasPy-Cloning**

298 In order to improve the flexibility of the CREasPy-cloning process, we attempted to perform  
299 the chromosome cleavage step *in vitro* (Figure S7). Indeed, this alternative strategy could  
300 offer several benefits compared to the *in vivo* method described above: *i*) it would not be  
301 necessary to “prime” the yeast with the pgRNA and pCas9 plasmids, reducing the number of  
302 transformation steps to one, *ii*) the selection markers used to maintain the pgRNA and pCas9  
303 plasmids could be allocated for other purposes, *iii*) a large number of different gRNA could  
304 be used simultaneously without the need to build a complex multi-gRNA plasmid, *iv*) the host  
305 cell genome could not be damaged by off-target activity, as the nuclease is not present in the  
306 cell. To do so, agarose plugs containing *M. pneumoniae* chromosomes were incubated in a  
307 mix of recombinant Cas9 from *S. pyogenes* and gRNA expressed by *in vitro* transcription  
308 from oligonucleotides. The Cas9-gRNA complex is able to diffuse through the agarose matrix  
309 and cleave the chromosome at the target site. The cut chromosome was subsequently co-  
310 transformed in yeast together with a recombination cassette bearing the yeast elements.

311 We validated this *in vitro* CREasPy-cloning strategy by targeting MPN400, using the same  
312 recombination cassette and gRNA spacer as those used in the *in vivo* approach. Ten yeast  
313 transformants were subsequently screened as described above (Figure S8): all the checked  
314 clones were positive by simplex PCR, and four were positive by multiplex. Of these, three  
315 were validated by PFGE.

316 These results confirm the functionality of the *in vitro* approach, albeit with a slightly reduced  
317 efficiency compared to the *in vivo* strategy. Similar strategies, based on *in vitro* cleavage of  
318 DNA by CRISPR/Cas9 followed by capture in yeast have been highlighted by other

319 groups<sup>43,44</sup> but these approaches are currently limited to sizes below 150 kbp and are not  
320 suitable to work on whole bacterial genomes. To go on further, optimization of multiple  
321 parameters could be considered, including the concentration of Cas9 and gRNA, the  
322 incubation time and the amount of target chromosomes per agarose plug.

323

## 324 **CONCLUSION**

325 In this study, we developed the CREasPy-cloning tool, to efficiently clone megabase-sized  
326 DNA molecules in *S. cerevisiae*, while simultaneously editing up to three independent loci.  
327 This approach was originally conceived in order to improve the cloning process of bacterial  
328 genomes, in particular of the genus *Mycoplasma*, and to significantly shorten the time  
329 necessary to produce highly engineered strains for academic or applied purposes<sup>45</sup>.

330 However, our method is not limited to this type of application, as its reliance on the  
331 CRISPR/Cas9 system and homologous recombination makes it highly versatile and able to  
332 process DNA from different origins and of various sizes, as the entire genomes of some  
333 viruses, bacteria, chloroplasts and mitochondria or parts of more complex genomes as those  
334 of eukaryotic cells.

335 In particular, we propose that CREasPy-cloning could be a valuable tool to capture intact  
336 chromosomes of uncultivable microorganisms from environmental samples (Figure S10). A  
337 target sequence could be selected based on previous or co-occurring metagenomics analysis,  
338 even if only small contigs are available. By producing an appropriate gRNA and  
339 recombination cassette, the chromosome of interest could in effect be “fished-out” by the  
340 yeast from the complex mixture of environmental DNA. Once cloned in yeast, these genomes  
341 could be easily sequenced and assembled in a single contig, which might not be possible  
342 using shotgun metagenome sequencing for rare organisms<sup>46</sup>.

343

## 344 **METHODS**

### 345 **Yeast and bacterial strains, culture conditions**

346 *Saccharomyces cerevisiae* strain VL6-48N (*MATa*, *his3-Δ200*, *trp1-Δ1*, *ura3-52*, *lys2*, *ade2-101*,  
347 *met14*) is grown at 30°C in YPDA medium (Clontech). Yeast transformants are selected  
348 by growth in Synthetic Defined (SD) medium depleted for one or several amino-acids: SD-  
349 Trp, SD-His or SD-Trp-Ura (Clontech). *Mycoplasma pneumoniae* strain M129 (ATCC  
350 29342), *Mycoplasma leachii* strain PG50 (*M. leachii*) and *Mycoplasma mycoides* subsp.  
351 *mycoides* strain Afadé (*Mmm*) are grown at 37°C in SP5 medium<sup>39</sup>. *Escherichia coli* strains

352 DH10B, strain NEB5- $\alpha$  or strain NEB10- $\beta$  used for plasmid cloning are grown at 37°C in  
353 lysogenic broth (LB) medium supplemented with 100  $\mu\text{g.mL}^{-1}$  of ampicillin.

354

### 355 **Oligonucleotides**

356 All the oligonucleotides used for this study are supplied by Eurogentec and are described in  
357 Table S3.

358

### 359 **Construction of gRNA plasmids for simple target deletion**

360 The gRNA targeting the loci MPN372, MPN142 and MPN400 in the *M. pneumoniae*  
361 genome, MSB\_A0138 in the *M. leachii* genome and TS60\_0301-0299 in the *Mmm* genome,  
362 are designed using the SSC tool (<http://crispr.dfci.harvard.edu/SSC/>) with default parameters.

363 The corresponding pgRNA plasmids are constructed following the protocol described in  
364 Tsarmopoulos *et al.*, 2015<sup>13</sup>. Briefly, the plasmid p426-SNR52p-gRNA.AarI.Y-SUP4t  
365 ("pgRNA") contains all the elements necessary for the expression of the gRNA in yeast<sup>12</sup>. The  
366 spacer component of the gRNA can be swapped out by restriction of the plasmid using AarI,  
367 followed by ligation of annealed oligonucleotides pairs. The resulting plasmids are  
368 transformed in *E. coli* and sequence verified.

369

### 370 **Construction of gRNA plasmid for triple targets deletion**

371 The cassettes allowing the expression of the gRNAMPN142 and gRNAMPN400 are first  
372 amplified by PCR from the plasmids pgRNAMPN142 and pgRNAMPN400 respectively.  
373 These two cassettes are subsequently cloned in the plasmid pgRNAMPN372, using the  
374 Gibson Assembly Cloning Kit (NEB). The resulting plasmid pgRNA-triple-target is  
375 transformed in *E. coli* and sequence verified.

376

### 377 **Construction of gRNA plasmids for double targets deletion**

378 The cassettes allowing the expression of the gRNAMPN142 and the gRNAMPN400 are PCR  
379 amplified from the plasmid pgRNA-triple-target. The resulting fragments are cloned in the  
380 linearized pgRNAMPN372 (described above), using the Gibson Assembly Cloning Kit  
381 (NEB), producing the plasmids pgRNAMPN372-142 and pgRNAMPN372-400 respectively.  
382 The pgRNAMPN142-400 plasmid is constructed by removing the gRNAMPN372 from the  
383 pgRNA-triple-target plasmid using the Q5 Site-Directed Mutagenesis Kit (NEB).

384

### 385 **Plasmid transformation in yeast**

386 Yeast are transformed using the lithium acetate protocol optimized by Gietz *et al* (1995)<sup>47</sup>.  
387 One µg of purified plasmid is used for each transformation, and transformants are selected for  
388 auxotrophy complementation (gRNA plasmid: -Ura and Cas9 plasmid: -Trp).

389

### 390 **Construction of recombination templates**

391 Recombination templates containing the yeast elements are produced by PCR amplification of  
392 the ARS/CEN/HIS/PSPuro or CEN/HIS/PSPuro loci from the plasmid pMT85-PRS-PSpuro  
393 (Figure S11), using the Advantage 2 Polymerase kit (Clontech). Complementary 60 bp-ends  
394 to the target sequence on *M. pneumoniae* genome are added to the extremities of the cassettes  
395 by using 5'-tailed PCR primers. Recombination templates comprised only of the regions  
396 flanking the loci to delete (without yeast element) are produced either by: (a) annealing of two  
397 90 bp oligonucleotides, with 45 bp corresponding to each side of the region to be knocked-out  
398 (initial denaturing step of 5 min at 95°C and controlled cooling to 16°C with a ramp of  
399 0.1°C.s<sup>-1</sup>), or (b) overlap PCR of two DNA fragments of 500 bp amplified from the *M.*  
400 *pneumoniae* genome using the Q5 High-Fidelity DNA Polymerase, with each 500 bp PCR  
401 fragments corresponding to the DNA sequence surrounding the loci to be deleted.

402

### 403 **Isolation of mycoplasma chromosomes in agarose plugs**

404 Mycoplasma cells are grown in SP5 media, and harvested either by scrapping the culture flask  
405 bottom in HEPES-Sucrose buffer (HEPES 8mM, sucrose 272mM, pH 7.4) for *M.*  
406 *pneumoniae* or by centrifugation and resuspension in T/S buffer (10mM Tris pH 6.5, 500 mM  
407 sucrose) for *M. leachii* and *Mmm*, The cell suspension is then embedded in 1% low-melt  
408 agarose plugs and treated using the CHEF Mammalian Genomic DNA Plug Kit (Biorad),  
409 according to the manufacturer's protocol<sup>38,39</sup>. This preparation method yields agarose plugs  
410 that contain the isolated and intact mycoplasma chromosomes. The quality of the genomic  
411 DNA is checked by digesting trapped genomes with 50 units of restriction enzymes from  
412 NEB per half of agarose plug (NotI-HF for *M. pneumoniae*, XhoI for *M. leachii* and BssHII for  
413 *Mmm*) followed by a pulsed-field gel electrophoresis. Prior to yeast transformation,  
414 mycoplasma genomes are released by digestion of the agarose matrix with three units per plug  
415 of β-Agarase I (NEB), and the DNA concentration is measured using an Epoch™ Microplate  
416 Spectrophotometer (BioTek™).

417

### 418 **Yeast transformation with *Mycoplasma* chromosomes and recombination templates**

419 Yeast cells carrying the pCas9 and pgRNA plasmids are transformed as described by  
420 Kouprina and Larionov (2008)<sup>19</sup>. For the simple target deletion experiments, 100  $\mu$ L of yeast  
421 spheroplasts are mixed with 2  $\mu$ g of genomic DNA and 300 ng of recombination template  
422 containing the yeast elements. For the multiple target deletion experiments, 100  $\mu$ L of yeast  
423 spheroplasts are mixed with 2  $\mu$ g of genomic DNA, 300 ng of recombination template  
424 containing the yeast elements and 0.5 or 1  $\mu$ g of each recombination template without the  
425 yeast elements. After transformation, the yeast cells are selected on SD-His solid agar plates  
426 containing 1 M of sorbitol, for 4 days at 30°C. Individual colonies are picked and streaked on  
427 SD-His plates and incubated 2 days at 30°C. Then, one isolated colony per streak is patched  
428 on the same medium and incubated for 2 days at 30°C.

429

### 430 **Screening of yeast transformants carrying *Mycoplasma* genome**

431 Total genomic DNA is extracted from yeast transformants according to Kouprina and  
432 Larionov (2008)<sup>19</sup>. Positive clones are screened for both the presence of the *Mycoplasma*  
433 genome and the correct deletion of the target gene by PCR, using the Advantage 2  
434 Polymerase kit (Clontech) and specific primers located on either side of the target locus.  
435 Yeast transformants are then screened for bacterial genome completeness by multiplex PCR  
436 using two sets of PCR primers for *M. pneumoniae* (Table S3) and one set of primers for *M.*  
437 *leachii* and for *Mmm* (Table S4 and S5 respectively). Each set is comprised of ten pairs of  
438 primers evenly distributed across the bacterial genomes allowing the simultaneous  
439 amplification of ten fragments ranging from ~100 to ~1000 bp, in ~100 bp increment. Clones  
440 carrying mycoplasma genomes with no major rearrangements display a characteristic ten  
441 bands ladder-profile with each primer set. The multiplex PCR are performed using the Qiagen  
442 Multiplex PCR Kit according to the manufacturer's instructions.

443 Yeast clones appearing positive by multiplex PCR are ultimately analyzed by restriction  
444 digestion and pulsed-field gel electrophoresis (PFGE) to assess the size of the mycoplasma  
445 chromosome. To do so, yeast cells are grown in SD-His media, harvested, embedded in  
446 agarose plugs and lysed by treatments with zymolyase, proteinase K and detergents to yield  
447 intact chromosomes. At this stage, yeast plugs carrying *M. pneumoniae* genomes are treated  
448 slightly differently compared to those containing *M. leachii* or *Mmm* genomes. For *M.*  
449 *pneumoniae*, the agarose-embedded yeast DNA is digested overnight with SgrDI (50U/  $\frac{1}{2}$   
450 plug) from Thermo Scientific™ and submitted to a first PFGE (1% agarose, 0.5X TBE)  
451 during 24h, with a switch time of 50-90 s, at 6 volts.cm<sup>-1</sup>, an angle of 120° and a temperature  
452 of 14°C. The plugs are then treated overnight with Plasmid-Safe™ ATP-dependent DNase



453 (50U/ ½ plug) from Epicentre and loaded on a standard gel (1% agarose, 1X TAE, 120 min at  
454 120 volts). The plugs are finally digested overnight with NotI-HF (50U/ ½ plug) and  
455 submitted to a second PFGE for 22h (using the parameters previously described). The two  
456 first steps, both performed to electrophorese the linear yeast DNA out of the plugs while  
457 preserving the circular *M. pneumoniae* chromosome, turned out to be necessary to visualize  
458 the *M. pneumoniae* genome on gel at the end of the process. Yeast plugs carrying *M. leachii*  
459 or *Mmm* genomes are hydrolysed with a cocktail of restriction enzymes (AsiSI, FseI and  
460 RsrII) and submitted to classical electrophoresis. Then, after the electro-removal of the yeast  
461 linear chromosomes, the DNA remaining in plugs is restricted with XhoI (*M. leachii*) and  
462 BssHIII (*Mmm*) and submitted to PFGE. Pulse times are ramped from 60 to 120 s for 24 h at 6  
463 volts.cm<sup>-1</sup>. Agarose gels are stained with SYBR™ Gold Nucleic Acid Gel Stain  
464 (Invitrogen™) and PFGE patterns are scanned using the Vilbert Lourmat™ E-BOX™ VX2  
465 Complete Imaging system.

466

#### 467 **Genome sequencing**

468 Genomic DNA of yeast MPN372\*/MPN142-143 clone 4.8 clone harboring edited *M.*  
469 *pneumoniae* chromosome was purified using Qiagen Genomic-Tips 100/G and Genomic  
470 DNA Buffers as described in Istace *et al* (2017)<sup>48</sup>. DNA sequencing was performed at the  
471 Genome Transcriptome Facility of Bordeaux (<https://pgtb.cgfb.u-bordeaux.fr>) on a GridION  
472 (Oxford Nanopore, release 18.02, flowcell R9.4.A RevD) sequencer and a MiSeq sequencer  
473 (Illumina) using paired ends libraries. ONT sequencing generated ~1,870,000 reads whereas  
474 ~3,000,000 read pairs were obtained with Illumina technology. De novo assembly process  
475 included the following steps: (1) filtering long reads with Filtlong v0.2.0 (sequences >  
476 1000bp score phred >= 9, <https://github.com/rwwick/Filtlong> ), (2) selection of long reads  
477 mapping *M. pneumoniae* genome with Minimaps 2 :v2.15-r905<sup>49</sup> (73676 reads selected), (3)  
478 assembly using Minimap/minimiasm<sup>50</sup> (Miniasm 0.3-r179 : <https://github.com/lh3/miniasm>),  
479 correction and polishing with Racon v1.3.1<sup>51</sup> (4 cycles) and Pilon<sup>52</sup> v1.23 (4 cycles) tools.  
480 Illumina short reads used for polishing were trimmed with Trimmomatic<sup>53</sup> 0.38 (MINLEN:35,  
481 SLIDINGWINDOW:5:25). Whole genome alignment was performed with progressive  
482 MAUVE (version 20150226 and ref PMID:20593022). For short reads mapping onto M129  
483 reference genome, data processing including quality check, trimming, alignment with BWA  
484 (Galaxy Version 1.2.3) and variant calling using Varscan (Galaxy Version 0.1) was  
485 completed using Galaxy instance (<https://usegalaxy.org/>)<sup>54</sup>.



486

487 ***In vitro* CReasPy-cloning**

488 Agarose plugs containing *M. pneumoniae* chromosomes are incubated overnight at 37°C  
489 in presence of 1 µL of Cas9 Nuclease from *Streptococcus pyogenes* (M0386T, NEB) and  
490 21 µg of gRNA transcripts produced by *in vitro* transcription of oligonucleotides  
491 (HiScribe™ T7 High Yield RNA Synthesis kit from NEB). Plugs are then treated  
492 overnight at 50°C with 10 µL of proteinase K, washed several times in Tris 20mM pH8,  
493 EDTA 50mM and released from agarose gel by treatment with β-Agarase I (3  
494 units/plug). Yeast cells are finally transformed as previously described: 100µL of yeast  
495 spheroplasts are mixed with ~4 µg of genomic DNA (~50 µL of gDNA plus 50µL of TE  
496 1x) and 300 ng of recombination template containing the yeast elements. The yeast  
497 transformants are selected and screened as described above.

498

499 **ABBREVIATION**

500 CRISPR/Cas, Clustered Regularly Interspaced Short Palindromic Repeats/CRISPR-associated  
501 systems; PAM, Protospacer Adjacent Motif; PFGE, Pulse Field Gel Electrophoresis; TREC,  
502 Tandem Repeat Coupled with Endonuclease Cleavage; TREC-IN, TREC-assisted gene  
503 knock-IN; TAR cloning, Transformation-Associated Recombination cloning.

504

505 **AUTHOR INFORMATION**

506 Corresponding author: carole.lartigue-prat@inra.fr

507 INRA, UMR 1332 de Biologie du Fruit et Pathologie, F-33140 Villenave d'Ornon, France

508 Université de Bordeaux, UMR 1332 de Biologie du Fruit et Pathologie, F-33140 Villenave  
509 d'Ornon, France

510 Tel: +33 5 57 12 23 59; Fax: +33 5 57 12 23 69;

511

512 **CONFLICT OF INTEREST**

513 The authors declare no competing financial interests.

514

515 **AUTHOR CONTRIBUTION:**

516 E.R., M.L-S., Y.A. and C.L. conceived and designed the research.

517 E.R., V.T., M-P.D., G.G and C.L. performed laboratory experiments and analyzed the *in vitro*  
518 data.

519 P.S.-P. performed genome sequencing design and subsequent analyses.

520 F. S. performed de novo assembly of mycoplasma genome.

521 E.R., Y.A. P.S.P. and C.L. wrote the paper.

522 All authors approved the final version of the paper.

523

## 524 **ACKNOWLEDGMENTS**

525 The authors thank the Genome Transcriptome Facility of Bordeaux for genome sequencing  
526 (<https://pgtb.cgfb.u-bordeaux.fr>) (grants from the Conseil Régional d'Aquitaine  
527 n°20030304002FA and 20040305003FA, from the European Union FEDER n°2003227 and  
528 from Investissements d'Avenir ANR-10-EQPX-16-01). They also thank Géraldine Gourgues,  
529 Dr. Fabien Labroussaa and Angélique Alonso-Marrau for skilled technical assistance, Dr.  
530 Iason Tsarmopoulos for providing biological material and advices and Pr. Alain Blanchard  
531 for revising the manuscript.

532 This work is part of the European MiniCell project « A model-driven approach to minimal  
533 cell engineering for medical therapy » selected by ANR, in the frame of the ERASynBio 2nd  
534 Joint Call for Transnational Research Projects (N° ANR-15-SYNB-0001-04). It has also been  
535 supported by the National Science Foundation [grant number IOS-1110151] and the European  
536 Union's Horizon 2020 research and innovation program under grant agreement N°634942.

537

538

## 539 **REFERENCES**

- 540 1. Griffiths, A. J., Miller, J. H., Suzuki, D. T. & Lewontin, R. C. *Introduction to Genetic*  
541 *Analysis*. (De Boeck, 2000).
- 542 2. Nicholl, D. S. T. *An Introduction to Genetic Engineering*. (Cambridge University  
543 Press, 2008). doi:10.1017/CBO9780511800986
- 544 3. Lacks, S. A. Rambling and scrambling in bacterial transformation--a historical and  
545 personal memoir. *J. Bacteriol.* **185**, 1–6 (2003).
- 546 4. Adli, M. The CRISPR tool kit for genome editing and beyond. *Nat. Commun.* **9**, 1911  
547 (2018).
- 548 5. Joung, J. K. & Sander, J. D. TALENs: a widely applicable technology for targeted  
549 genome editing. *Nat. Rev. Mol. Cell Biol.* **14**, 49–55 (2013).
- 550 6. Russell, J. J. *et al.* Non-model model organisms. *BMC Biol.* **15**, 55 (2017).
- 551 7. Benders, G. a *et al.* Cloning whole bacterial genomes in yeast. *Nucleic Acids Res.* **38**,  
552 2558–69 (2010).

- 553 8. Gibson, D. G. *et al.* Creation of a bacterial cell controlled by a chemically synthesized  
554 genome. *Science* **329**, 52–6 (2010).
- 555 9. Hutchison, C. A. *et al.* Design and synthesis of a minimal bacterial genome. *Science*  
556 (80-. ). **351**, (2016).
- 557 10. Noskov, V. N., Segall-Shapiro, T. H. & Chuang, R. Y. Tandem repeat coupled with  
558 endonuclease cleavage (TREC): A seamless modification tool for genome engineering  
559 in yeast. *Nucleic Acids Res.* **38**, 2570–2576 (2010).
- 560 11. Chandran, S. *et al.* TREC-IN: gene knock-in genetic tool for genomes cloned in yeast.  
561 *BMC Genomics* **15**, 1180 (2014).
- 562 12. DiCarlo, J. E. *et al.* Genome engineering in *Saccharomyces cerevisiae* using CRISPR-  
563 Cas systems. *Nucleic Acids Res.* **41**, 4336–4343 (2013).
- 564 13. Tsarmopoulos, I. *et al.* In-Yeast Engineering of a Bacterial Genome Using  
565 CRISPR/Cas9. *ACS Synth. Biol.* **5**, 104–9 (2016).
- 566 14. Ketner, G., Spencer, F., Tugendreich, S., Connelly, C. & Hieter, P. Efficient  
567 manipulation of the human adenovirus genome as an infectious yeast artificial  
568 chromosome clone. *Proc. Natl. Acad. Sci.* **91**, 6186–90 (1994).
- 569 15. García-Ramírez, J. J. *et al.* Dominance of virus over host factors in cross-species  
570 activation of human cytomegalovirus early gene expression. *J. Virol.* **75**, 26–35 (2001).
- 571 16. Karas, B. J., Suzuki, Y. & Weyman, P. D. Strategies for cloning and manipulating  
572 natural and synthetic chromosomes. *Chromosom. Res.* **23**, 57–68 (2015).
- 573 17. Karas, B. J. *et al.* Direct transfer of whole genomes from bacteria to yeast. **10**, 410–412  
574 (2014).
- 575 18. B.J., K. *et al.* Assembly of eukaryotic algal chromosomes in yeast. *J. Biol. Eng.* **7**, 1–  
576 12 (2013).
- 577 19. Kouprina, N. & Larionov, V. Selective isolation of genomic loci from complex  
578 genomes by transformation-associated recombination cloning in the yeast  
579 *Saccharomyces cerevisiae*. *Nat. Protoc.* **3**, 371–377 (2008).
- 580 20. Xiao, L. *et al.* Comparative genome analysis of *Mycoplasma pneumoniae*. *BMC*  
581 *Genomics* **16**, 610 (2015).
- 582 21. Wise, K. S. *et al.* Complete genome sequences of *Mycoplasma leachii* strain PG50T  
583 and the pathogenic *Mycoplasma mycoides* subsp. *mycoides* small colony biotype strain  
584 Gladysdale. *J. Bacteriol.* **194**, 4448–9 (2012).
- 585 22. Mali, P. *et al.* RNA-Guided Human Genome Engineering via Cas9. *Science* (80-. ).  
586 **339**, 823–826 (2013).

- 587 23. Firrao, G. *et al.* Genome wide sequence analysis grants unbiased definition of species  
588 boundaries in ‘Candidatus Phytoplasma’. *Syst. Appl. Microbiol.* **36**, 539–48 (2013).
- 589 24. Lartigue, C. *et al.* Genome transplantation in bacteria: changing one species to another.  
590 *Science* **317**, 632–8 (2007).
- 591 25. Becker, A. *et al.* Structure of CARDS toxin, a unique ADP-ribosylating and  
592 vacuolating cytotoxin from *Mycoplasma pneumoniae*. *Proc. Natl. Acad. Sci. U. S. A.*  
593 **112**, 5165–70 (2015).
- 594 26. Hansen, E. J., Wilson, R. M. & Baseman, J. B. Two-dimensional gel electrophoretic  
595 comparison of proteins from virulent and avirulent strains of *Mycoplasma pneumoniae*.  
596 *Infect. Immun.* **24**, 468–75 (1979).
- 597 27. Lipman, R. P., Clyde, W. A., Denny, F. W. & Denny, F. W. Characteristics of virulent,  
598 attenuated, and avirulent *Mycoplasma pneumoniae* strains. *J. Bacteriol.* **100**, 1037–43  
599 (1969).
- 600 28. Grover, R. K. *et al.* A structurally distinct human mycoplasma protein that generically  
601 blocks antigen-antibody union. *Science* **343**, 656–61 (2014).
- 602 29. Glass, J. I. *et al.* Essential genes of a minimal bacterium. *Proc. Natl. Acad. Sci. United*  
603 *States Am.* **103**, 425–430 (2006).
- 604 30. Schaefer, K. A. *et al.* Unexpected mutations after CRISPR-Cas9 editing in vivo. *Nat.*  
605 *Methods* **14**, 547–548 (2017).
- 606 31. Zhang, X.-H., Tee, L. Y., Wang, X.-G., Huang, Q.-S. & Yang, S.-H. Off-target Effects  
607 in CRISPR/Cas9-mediated Genome Engineering. *Mol. Ther. Nucleic Acids* **4**, e264  
608 (2015).
- 609 32. Lin, Y. *et al.* CRISPR/Cas9 systems have off-target activity with insertions or deletions  
610 between target DNA and guide RNA sequences. *Nucleic Acids Res.* **42**, 7473–85  
611 (2014).
- 612 33. Rocha, E. P. C. & Blanchard, A. Genomic repeats, genome plasticity and the dynamics  
613 of *Mycoplasma* evolution. *Nucleic Acids Res.* **30**, 2031–42 (2002).
- 614 34. Himmelreich, R. *et al.* Complete sequence analysis of the genome of the bacterium  
615 *Mycoplasma pneumoniae*. *Nucleic Acids Res.* **24**, 4420–49 (1996).
- 616 35. Himmelreich, R., Plagens, H., Hilbert, H., Reiner, B. & Herrmann, R. Comparative  
617 analysis of the genomes of the bacteria *Mycoplasma pneumoniae* and *Mycoplasma*  
618 *genitalium*. *Nucleic Acids Res.* **25**, 701–12 (1997).
- 619 36. Newlon, C. S. & Theis, J. F. The structure and function of yeast ARS elements. *Curr.*  
620 *Opin. Genet. Dev.* **3**, 752–758 (1993).

- 621 37. Noskov, V. N. *et al.* Defining the minimal length of sequence homology required for  
622 selective gene isolation by TAR cloning. *Nucleic Acids Res.* **29**, E32 (2001).
- 623 38. Lartigue, C. *et al.* Creating bacterial strains from genomes that have been cloned and  
624 engineered in yeast. *Science* **325**, 1693–6 (2009).
- 625 39. Labroussaa, F. *et al.* Impact of donor-recipient phylogenetic distance on bacterial  
626 genome transplantation. *Nucleic Acids Res.* **44**, 8501–11 (2016).
- 627 40. Shao, Y. *et al.* Creating a functional single-chromosome yeast. *Nature* **560**, 331–335  
628 (2018).
- 629 41. Richardson, S. M. *et al.* Design of a synthetic yeast genome Downloaded from. *Science*  
630 (80-. ). **355**, 1040–1044 (2017).
- 631 42. Slaymaker, I. M. *et al.* Rationally engineered Cas9 nucleases with improved  
632 specificity. *Science (80-. ).* **351**, 84–88 (2016).
- 633 43. Lee, N. C. O., Larionov, V. & Kouprina, N. Highly efficient CRISPR/Cas9-mediated  
634 TAR cloning of genes and chromosomal loci from complex genomes in yeast. *Nucleic*  
635 *Acids Res.* **43**, e55 (2015).
- 636 44. Jiang, W. *et al.* Cas9-Assisted Targeting of CHromosome segments CATCH enables  
637 one-step targeted cloning of large gene clusters. *Nat. Commun.* **6**, 1–8 (2015).
- 638 45. Jores, J. *et al.* Removal of a subset of non-essential genes fully attenuates a highly  
639 virulent Mycoplasma strain. *bioRxiv* 508978 (2019). doi:10.1101/508978
- 640 46. Forster, S. C. *et al.* A human gut bacterial genome and culture collection for improved  
641 metagenomic analyses. *Nat. Biotechnol.* **37**, 186–192 (2019).
- 642 47. Gietz, R. D., Schiestl, R. H., Willems, A. R. & Woods, R. A. Studies on the  
643 transformation of intact yeast cells by the LiAc/SS-DNA/PEG procedure. *Yeast* **11**,  
644 355–360 (1995).
- 645 48. Istace, B. *et al.* de novo assembly and population genomic survey of natural yeast  
646 isolates with the Oxford Nanopore MinION sequencer. *Gigascience* **6**, 1–13 (2017).
- 647 49. Li, H. Minimap2: pairwise alignment for nucleotide sequences. *Bioinformatics* **34**,  
648 3094–3100 (2018).
- 649 50. Li, H. Minimap and miniasm: fast mapping and de novo assembly for noisy long  
650 sequences. *Bioinformatics* **32**, 2103–10 (2016).
- 651 51. Vaser, R., Sović, I., Nagarajan, N. & Šikić, M. Fast and accurate de novo genome  
652 assembly from long uncorrected reads. *Genome Res.* **27**, 737–746 (2017).
- 653 52. Walker, B. J. *et al.* Pilon: an integrated tool for comprehensive microbial variant  
654 detection and genome assembly improvement. *PLoS One* **9**, e112963 (2014).

- 655 53. Bolger, A. M., Lohse, M. & Usadel, B. Trimmomatic: a flexible trimmer for Illumina  
656 sequence data. *Bioinformatics* **30**, 2114–2120 (2014).
- 657 54. Afgan, E. *et al.* The Galaxy platform for accessible, reproducible and collaborative  
658 biomedical analyses: 2016 update. *Nucleic Acids Res.* **44**, W3–W10 (2016).

659  
660  
661  
662  
663

#### 664 **FIGURE LEGENDS**

665 **Figure 1. Overview of the CReasPy-cloning method and its application to *M.***  
666 ***pneumoniae* M129 genome.** (A) Schematic diagram of the experimental procedure of  
667 CReasPy-cloning. A yeast is transformed beforehand with two plasmids, allowing the  
668 expression of the Cas9 nuclease and a gRNA. This yeast is then transformed simultaneously  
669 with the genome to be cloned and a fragment of linear DNA containing the yeast elements  
670 (centromere, selection marker) flanked by two recombination arms homologous to each side  
671 of the target locus. Upon entry in the cell, the target genome is cleaved by the Cas9/gRNA  
672 complex, and subsequently repaired by the yeast homologous recombination system, using  
673 the provided linear DNA fragment as template. As a result, the bacterial genome now includes  
674 the yeast elements inserted at a precise locus (here with precise deletion of a target red gene),  
675 and is now carried by the yeast as an artificial chromosome. (B) Map of *M. pneumoniae*  
676 M129 genome. The location of the three targeted loci (MPN372, MPN142 and MPN400) is  
677 indicated by colored arrows. (C) Schematic view of the genomic regions surrounding the  
678 targeted loci. The location of the gRNA protospacer sequence is indicated by a black bar. The  
679 locations of the recombination arms are indicated by small rectangles connected by a dotted  
680 line.

681

682 **Figure 2. Screening of yeast transformants generated by CReasPy-cloning of *M.***  
683 ***pneumoniae* M129 genome and deletion of MPN372.** The images used to produce panels  
684 A-C are spliced from multiple gels in order to display the same 20 yeast clones. Original  
685 images are available in Supplementary Figure S3. (A) The presence of the *M. pneumoniae*  
686 genome in the yeast and the desired target replacement were checked by simplex PCR  
687 analysis. Using *M. pneumoniae* specific primers flanking the target gene, a 3,595 bp amplicon  
688 was expected in properly edited clones, whereas a fragment of 2,020 bp was expected for wild

689 types clones. (B-C) The completeness of the *M. pneumoniae* genome cloned in yeast was  
690 assessed by multiplex PCR using two sets of primers (Top: set 1, Bottom: set 2). Each set  
691 consisted in ten pairs of primers evenly distributed around the genome of *M. pneumoniae*,  
692 allowing the simultaneous amplification of ten fragments ranging from 100 to 1,000 bp (set 1)  
693 and from 125 to 1,025 bp (set 2) in 100 bp increments. Clones carrying *M. pneumoniae*  
694 genomes without major rearrangement displayed a ten bands profile identical to the one  
695 obtained in the positive control. “M”: DNA Ladder; “+”: *M. pneumoniae* M129 gDNA; “-”:  
696 negative control without DNA. (C) The sizes of the *M. pneumoniae* genomes cloned in yeast  
697 were assessed by enzymatic restriction and Pulsed Field Gel Electrophoresis (PFGE).  
698 Digestion of the bacterial genome with the restriction enzyme NotI-HF should release two  
699 linear DNA fragments of 711 kbp and 105 kbp. “M”: PFGE DNA ladder; “Sc”: *S. cerevisiae*  
700 VL6-48N; “+”: *M. pneumoniae* M129.

701

702 **Figure 3. Overview of the multi-target CreasPy-cloning method.** Yeast cells are  
703 transformed beforehand with two plasmids, allowing the expression of the Cas9 nuclease and  
704 multiple gRNA. The yeast is then transformed simultaneously with the target genome and  
705 three linear DNA fragments. One fragment contains the yeast elements (centromere, selection  
706 marker) flanked by two regions homologous to the target locus. The two remaining fragments  
707 are each comprised of two regions homologous to the target locus concatenated. Upon entry  
708 in the cell, the heterologous genome is cleaved at multiple loci by the Cas9/gRNA complexes,  
709 and subsequently repaired by the yeast homologous recombination system using the provided  
710 linear DNA templates. As a result, the heterologous chromosome now bears the yeast  
711 elements, inserted at a precise locus, and is now carried by the yeast as an artificial  
712 chromosome. In addition, the two other loci are edited, according to the experimenters design.

713

714 **Figure 4. Screening of yeast transformants generated by CreasPy-cloning carrying**  
715 ***Mycoplasma pneumoniae* M129 genome and deletion of MPN372\*/MPN142/MPN400.**

716 The images used to produce panels A-E are spliced from multiple gels in order to display the  
717 same 20 yeast clones. Original images are available in Supplementary Figure S6. (A) The  
718 presence of the *M. pneumoniae* genome in the yeast and the correct replacement of MPN372  
719 were checked by simplex PCR analysis. Using *M. pneumoniae* specific primers flanking the  
720 target gene, an amplicon of 3,595 bp was expected in properly edited clones, whereas a  
721 fragment of 2,020 bp was expected for wild types clones. (B) The correct deletion of  
722 MPN142 was assessed by simplex PCR analysis. The expected amplicon size in clones



723 bearing the deletion was 965 bp, whereas an amplicon of 4,598 bp was expected for clones  
724 bearing the wild-type genome. (C) The correct deletion of MPN400 was assessed by simplex  
725 PCR analysis. The expected amplicon size in clones bearing the deletion was 2,156 bp,  
726 whereas an amplicon of 4,048 bp was expected for clones bearing the wild-type genome. (D)  
727 The completeness of *M. pneumoniae* genome in yeast was assessed by multiplex PCR using  
728 two sets of primers (see Figure 2 legend). Clones carrying *M. pneumoniae* genomes without  
729 major rearrangement displayed a ten bands profile identical to the one obtained in the positive  
730 control. “M”: DNA Ladder; “+”: *M. pneumoniae* M129 gDNA; “-”: negative control without  
731 DNA. (E) The size of the *M. pneumoniae* genome in yeast was assessed by enzymatic  
732 restriction and pulsed-field gel electrophoresis (PFGE). Digestion by the restriction enzyme  
733 NotI-HF should yield two linear DNA fragments of 711 kbp and 105 kbp. “M”: PFGE DNA  
734 ladder, “Sc”: *S. cerevisiae* VL6-48N; “+”: *M. pneumoniae* M129.  
735  
736

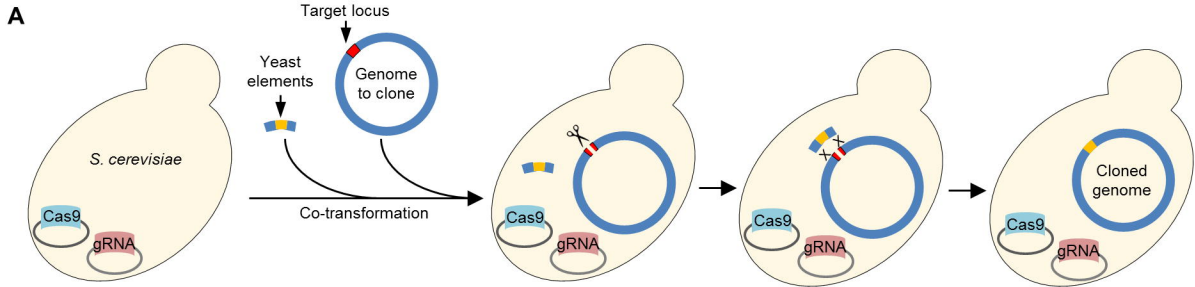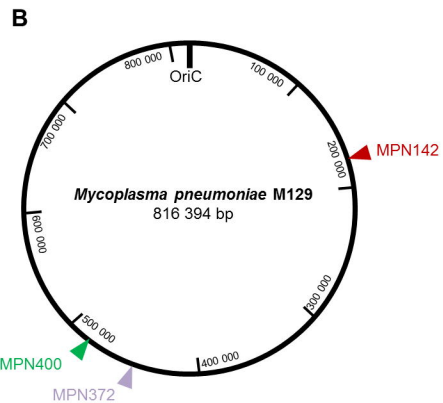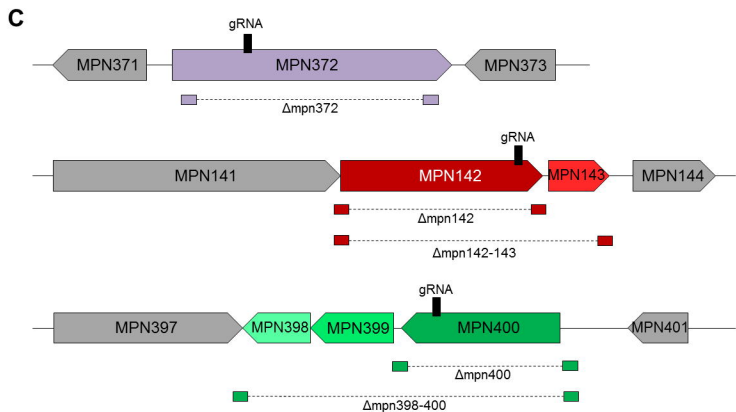

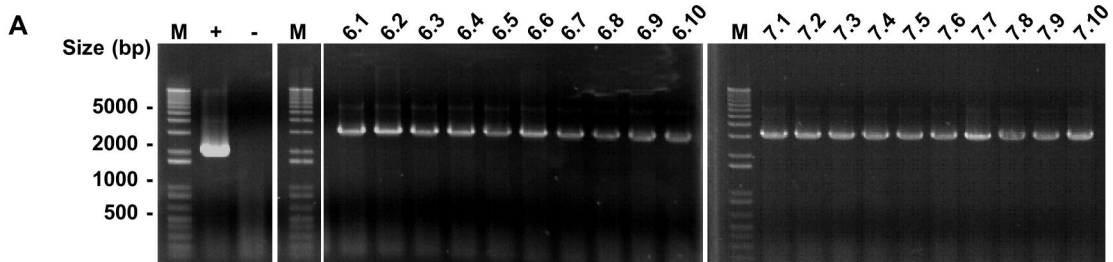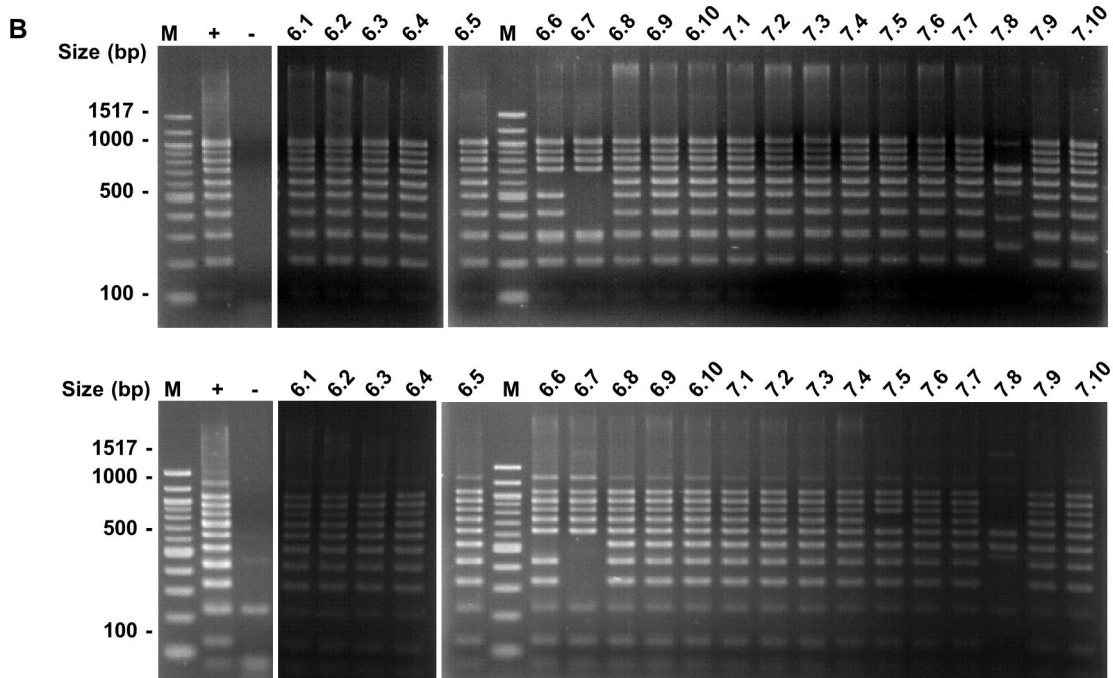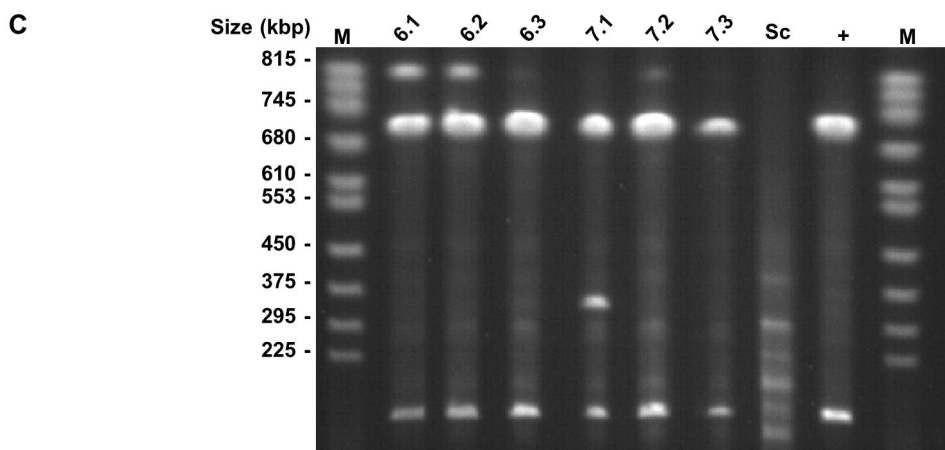

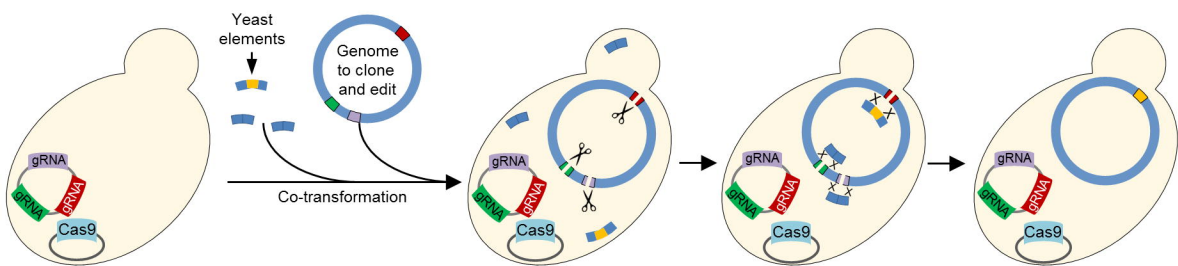

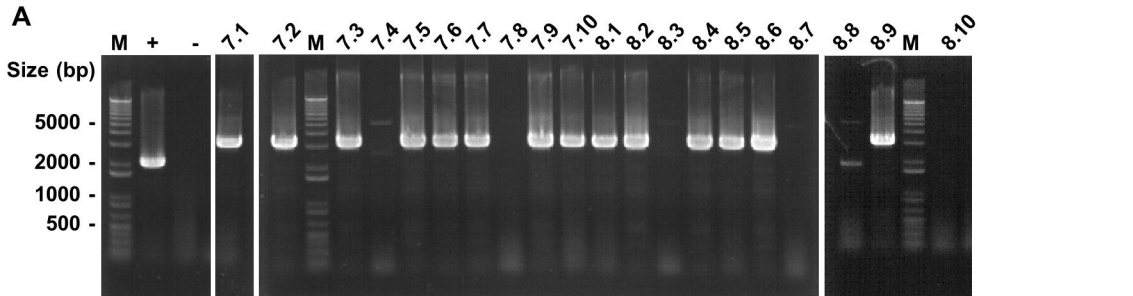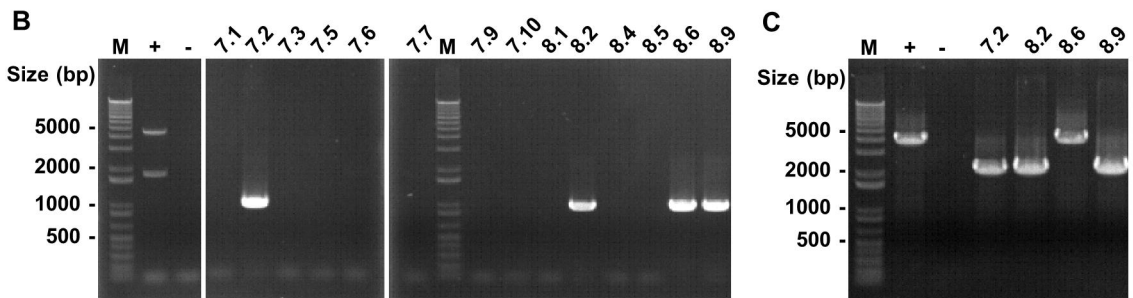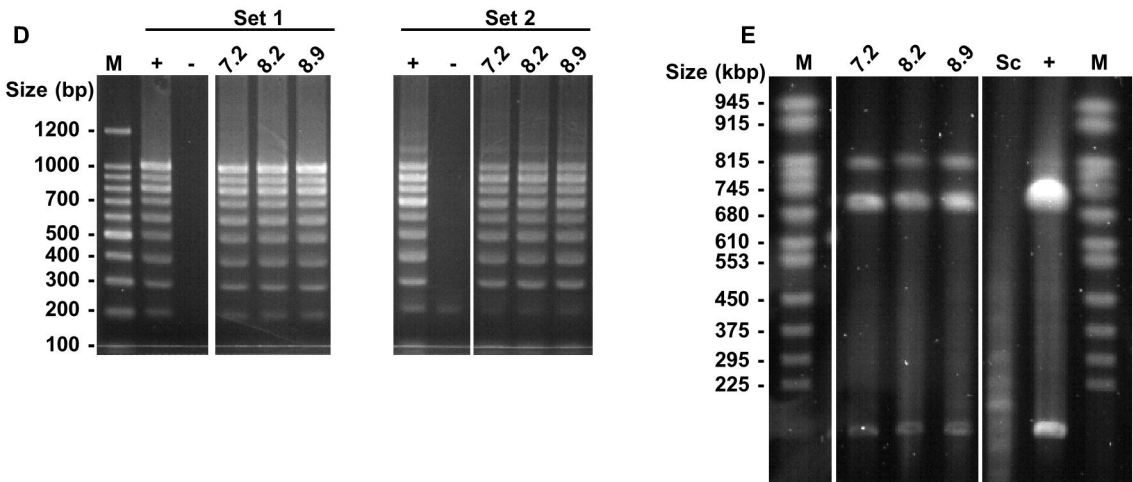

Source: http://biorxiv.org/content/10.1101/647750v1.full.pdf
